## The heterotrimeric $G_{i3}$ protein acts in slow but not in fast exocytosis of rat melanotrophs

Marko Kreft<sup>1</sup>, Stéphane Gasman<sup>2</sup>, Sylvette Chasserot-Golaz<sup>2</sup>, Vlasta Kuster<sup>1</sup>, Marjan Rupnik<sup>1</sup>, Sujit K. Sikdar<sup>1,3</sup>, Marie-France Bader<sup>2</sup> and Robert Zorec<sup>1,†</sup>

<sup>1</sup>Laboratory of Neuroendocrinology-Molecular Cell Physiology, Institute of Pathophysiology, School of Medicine, P.O.B 2211, 1001 Ljubljana, Slovenia

<sup>2</sup>Institut National de la Santé et de la Recherche Médicale, U-338 Biologie de la Communication Cellulaire, 5 rue Blaise Pascal, 67084 Strasbourg, France

<sup>3</sup>Present address: Molecular Biophysics Unit, Indian Institute of Sciences, Bangalore, India

<sup>†</sup>Author for correspondence

Accepted 1 September; published on WWW 3 November 1999

### SUMMARY

Besides having a role in signal transduction some trimeric G-proteins may be involved in a late stage of exocytosis. Using immunocytochemistry and confocal microscopy we found that  $G_{i3}$ -protein resides mainly in the plasma membrane, whereas  $G_{i1/2}$ -protein is preferentially associated with secretory granules. To study the function of trimeric  $G_{i3}$ - and  $G_{i1/2}$ -proteins, secretory responses in single rat melanotrophs were monitored by patch-clamp membrane capacitance measurements. We report here that mastoparan, an activator of trimeric G-proteins, enhances calcium-induced secretory activity in rat melanotrophs. The introduction of synthetic peptides corresponding to the C-terminal domain of the  $\alpha$ -subunit of  $G_{i3}$ - and  $G_{i1/2}$ -proteins indicated that  $G_{i3}$  peptide specifically blocked the

mastoparan-stimulated secretory activity, which indicates an involvement of a trimeric  $G_{i3}$ -protein in mastoparan-stimulated secretory activity. Flash photolysis of caged  $Ca^{2+}$ -elicited biphasic capacitance increases consisting of a fast and a slower component. Injection of anti- $G_{i3}$  antibodies selectively inhibited the slow but not the fast component of secretory activity in rat melanotrophs. We propose that the plasma membrane-bound  $G_{i3}$ -protein may be involved in regulated secretion by specifically controlling the slower kinetic component of exocytosis.

Key words: Kinetic component, Membrane capacitance, Regulated exocytosis, Trimeric G-protein

### INTRODUCTION

Studies on diverse secretory cell types have highlighted the importance of GTP-binding proteins in calcium-regulated exocytic fusion of vesicles or granules with the plasma membrane (see reviews, Südhof, 1995; Calakos and Scheller, 1996; Martin, 1997; Burgoyne and Morgan, 1998). Proteins able to bind and hydrolyze GTP can be subdivided into different families including trimeric G proteins and *ras*-related low molecular mass G proteins. Trimeric G proteins have been found associated with the membrane of secretory granules in various secretory cells (Ahnert-Hilger et al., 1994; Konrad et al., 1995; Vitale et al., 1996). Thus, besides playing a role in the signal transduction cascade operating at the plasma membrane, trimeric G-proteins may also be involved in the regulation of calcium-evoked exocytosis. Indeed, the participation of  $G_i$  and  $G_o$  proteins in the late stages of exocytosis has been demonstrated in mast cells (Aridor et al., 1993), insulin-secreting cells (Lang et al., 1995) and chromaffin cells (Vitale et al., 1993, 1994a; Gasman et al., 1997). Taken together these observations suggest that regulated

exocytosis may represent a possible effector pathway for trimeric G proteins although the precise role of this class of G proteins at specific stages of the exocytotic machinery remains to be determined.

Subunits of trimeric G-proteins have been previously described on the plasma membrane and on the membrane of several intracellular compartments involved in the secretory pathway in rat pituitary (Muller et al., 1994). By immunocytochemistry, we provide here evidence that in rat melanotrophs  $G_{i3}$  resides mainly in the plasma membrane whereas  $G_{i1/2}$  is preferentially associated with the membrane of secretory granules. Melanotrophs secrete  $\alpha$ -melanocyte stimulating hormone ( $\alpha$ -MSH) and  $\beta$ -endorphin (Mains and Eipper, 1979). To study the function of  $G_{i3}$  and  $G_{i1/2}$  in  $\alpha$ -MSH and  $\beta$ -endorphin regulated secretion, we used patch-clamp membrane capacitance measurements to monitor exocytotic activity in single rat melanotrophs (Neher and Marty, 1982). Mastoparan, a specific activator of trimeric G-proteins was found to enhance calcium-dependent secretory activity in rat melanotrophs, in agreement with our previous observations (Rupnik et al., 1997). Peptides, corresponding to the C-

terminal domain of the  $\alpha$ -subunit of  $G_i$  and  $G_o$  have been shown to prevent the stimulation of G-proteins by their respective receptors or by mastoparan (Hamm et al., 1988; Palm et al., 1990). Therefore, the introduction of synthetic peptides corresponding to the C-terminal domain of the  $\alpha$ -subunit of  $G_{i3}$  and  $G_{i1/2}$  should inhibit mastoparan-enhanced changes in membrane capacitance elicited by a rise in intracellular  $[Ca^{2+}]_i$ , if  $\alpha$ -subunits of these  $G_i$  proteins are involved in the regulation of secretory activity of melanotrophs. We show that  $G_{i3}$  but not  $G_{i1/2}$  C-terminal peptides selectively inhibit mastoparan-enhanced changes in membrane capacitance.

In a series of experiments, cells were stimulated by increasing cytosolic calcium quickly and uniformly using flash photolysis of caged  $Ca^{2+}$  (Neher and Zucker, 1993). Photolysis of caged  $Ca^{2+}$  activated a biphasic membrane capacitance response, revealing an early and a slower phase of exocytosis, as reported previously (Neher and Zucker, 1993; Thomas et al., 1993a,b; Heinemann et al., 1994; Kasai et al., 1996; Takahashi et al., 1997; Ninomiya et al., 1997; Xu et al., 1998). Injection of specific antibodies against the  $\alpha$ -subunits of  $G_{i3}$ -protein selectively affected the slow but not the fast component of the membrane capacitance response. We propose that the plasma membrane-bound  $G_{i3}$ -protein may be involved in regulated secretion by specifically controlling the slow kinetic component of exocytosis.

## MATERIALS AND METHODS

### Cell cultures

Rat pituitary melanotrophs were isolated and dispersed mechanically and enzymatically according to methods described previously (Rupnik and Zorec, 1992), seeded on poly-L-lysine covered glass coverslips, and cultured in an incubator at 36°C, 95% humidity and 5%  $CO_2$  for up to a week before being used in the experiments.

### Immunofluorescence microscopy

Melanotrophs were washed with PBS (phosphate-buffered saline) and then fixed for 15 minutes in 4% paraformaldehyde in PBS. The following 10 minutes cells were kept in fixative containing 0.1% of Triton X-100 and then four times washed with PBS. Non-specific staining was reduced by incubating cells in 3% BSA (bovine serum albumin) and 10% normal goat serum in PBS. Cells were then incubated with primary antibodies for 2 hours at 37°C. We used 50  $\mu$ g/ml of rabbit affinity-purified anti- $G_{\alpha i1/2}$  and anti- $G_{\alpha i3}$  antibodies, prepared against a synthetic peptide corresponding to the C-terminal domain of  $G_{i3}$  and  $G_{i1/2}$  respectively as described (Vitale et al., 1996). We used mouse anti-Golgi antibody (Jasmin et al., 1989) undiluted, mouse anti-syntaxin I (Leveque et al., 1994; El Far et al., 1995) and anti-synaptotagmin I (Takahashi et al., 1991; Leveque et al., 1992) diluted 1:2000 in PBS containing 3% BSA. Cells were then washed and incubated in PBS containing Cy3-labelled anti-rabbit and FITC labelled anti-mouse secondary antibodies (1:2000) and 3% BSA for 45 minutes. Cells were washed and mounted in Light Antifade Kit (Molecular Probes, Netherlands). Stained cells were monitored using the Zeiss laser scanning microscope (LSM 410 invert) with a planapo oil immersion lens ( $\times 63$ , NA=1.4). FITC was excited using the argon laser (488 nm) and Cy3 using the He/Ne laser (543 nm). The FITC emission signal was filtered with a Zeiss 515-565 nm filter, and Cy3 emission signal was filtered using 595 nm long pass filter. Colocalization of the emission signal was evaluated as described (Chasserot-Golaz et al., 1996).

### Membrane capacitance measurements

Compensated and uncompensated membrane capacitance measurements were used (Neher and Marty, 1982; Lindau and Neher, 1988; Zorec et al., 1991) employing a SWAM CELL or SWAM IIB patch clamp/lock-in amplifier (Henigman, Piran, Slovenia), operating at 1.6 kHz lock-in frequency.

Compensated  $C_m$  measurements were used to monitor fast changes in membrane capacitance. Upon establishment of the whole-cell configuration  $C_m$  and  $G_a$  (access conductance) were compensated by  $C_{slow}$  and  $G_a$  compensation controls. Sine voltage of 11 to 111 mV<sub>rms</sub> was applied. The phase angle setting was determined by a 100 fF or 1 pF pulse and monitoring the projection of the pulse from the C (signal proportional to  $C_m$ ) to G output of the lock-in amplifier. These two signals were stored unfiltered (C-DAT4 recorder, Cygnus, USA) for off-line analysis. Simultaneously we recorded filtered (300 Hz, 4 pole Bessel) C and G signals, the fluorescence intensity from a C660 photon counter (Thorn EMI UK) and membrane current (0-10 Hz, low pass). PhoCal program (LSR, UK) was used to acquire signals every 5 milliseconds. For high temporal resolution measurements of  $C_m$ , the records on DAT were played back and a 10 second epoch of the signal enveloping each flash was digitized at 50 kHz using a CDR program (J. Dempster). Signals were digitally filtered at 1 kHz (2-way 150<sup>th</sup> order FIR filter, Math Works MATLAB) and resampled at 10 kHz. The pipette solution contained: 110 mM KCl, 10 mM TEACl, 40 mM KOH/Hepes (*N*-2-hydroxyethylpiperazine-*N'*-2-ethanesulphonic acid), 2 mM  $Na_2ATP$ , 2 mM  $MgCl_2$ , 4 mM  $K_4-NP-EGTA$  [*o*-nitrophenyl ethyleneglycol-bis-(*b*-aminoethyl-ether)-*N,N,N',N'*-tetrapotassium salt], 3.6 mM  $CaCl_2$ , 0.5 mM furaptra, pH 7.2. The bath contained: 131.8 mM NaCl, 5 mM KCl, 2 mM  $MgCl_2$ , 0.5 mM  $NaH_2PO_4$ , 5 mM  $NaHCO_3$ , 10 mM Na Hepes, 10 mM D-glucose, 1.8 mM  $CaCl_2$ , pH 7.2.

Uncompensated  $C_m$  measurements were used to monitor slow changes in  $C_m$  as described (Rupnik and Zorec, 1992). A sine wave voltage (1 mV rms, 1600 Hz) was applied to the holding potential. Output signals: DC current, holding potential, real and imaginary admittance (Bessel, low pass 10 Hz, -3 dB, 6-pole) were digitized by a CED 1401 A/D converted (Cambridge, UK) and analysed by the computer software (CAP3, J. Dempster, University of Strathclyde, UK). Software computed passive cell parameters: access conductance ( $G_a$ ), membrane conductance ( $G_m$ ) and membrane capacitance ( $C_m$ ). The recording bath solution consisted of: 131.8 mM NaCl, 1.8 mM  $CaCl_2$ , 5 mM KCl, 2 mM  $MgCl_2$ , 10 mM Hepes/NaOH, 10 mM D-glucose, 0.5 mM  $NaH_2PO_4 \cdot 2H_2O$ , 5 mM  $NaHCO_3$  (pH 7.2). The pipette solution consisted of: 150 mM KCl, 2 mM  $MgCl_2$ , 10 mM Hepes/KOH, 0.65 mM EGTA, 4.35 mM  $Ca^{2+}$ -saturated EGTA ( $[Ca^{2+}]_i = 1 \mu M$ ), 2 mM  $Na_2ATP$ , pH 7.2). Intracellular  $[Ca^{2+}]_i$  was calculated assuming an apparent dissociation constant ( $K_d$ ) for the Ca-EGTA complex of 150 nM (Grynkiewicz et al., 1985), and assuming that the cytosol equilibrates with the pipette solution upon the establishment of the whole-cell recording. Total EGTA concentration was 4 mM, which exceeds the buffering capacity of melanotrophs (Thomas et al., 1990). All recordings were made at room temperature. All salts were obtained from Sigma. Synthetic C-terminal peptides  $G_{\alpha i1/2}$  (KNNLKDCGLF) and  $G_{\alpha i3}$  (KNNLKECGLY) were obtained from Neosystem (Strasbourg, France), mastoparan was obtained from Sigma. Peptides were added to the pipette solution short before the experiment. Final concentration of  $G_{\alpha i}$  peptides and mastoparan was 100  $\mu M$  and 1  $\mu M$ , respectively. Cells were voltage clamped at a holding potential of -70 mV. The reversal potential of the whole-cell current was -50 mV and did not change during recordings. Recordings were made at room temperature with pipette resistance between 1 to 4 M $\Omega$  (measured in KCl-rich solution), giving access conductance of more than 80 nS. The pipette and bath solutions were of similar osmolarity (within 5%) measured by freezing point depression (Camlab, Cambridge, UK).

### Flash photolysis and [Ca<sup>2+</sup>]<sub>i</sub> measurements

We used NP-EGTA (*o*-nitrophenyl ethyleneglycol-bis-(*b*-aminoethyl-ether)-*N,N,N',N'*-tetraacetic acid, Molecular Probes, Oregon, USA or Calbiochem, Switzerland) to manipulate [Ca<sup>2+</sup>]<sub>i</sub> (Ellis-Davies and Kaplan, 1994). A UV flash from a Xe arc flash lamp (Rapp and Güth, 1988) was delivered to cells through a ×40 fluor oil immersion objective of a Nikon Diaphot microscope. The same optical pathway as in flash photolysis was used to illuminate the fluorescent [Ca<sup>2+</sup>]<sub>i</sub> indicator fura-2 (Molecular Probes, Oregon, USA). A combination of two dichroic mirrors was used. The first one was a 390 nm dichroic positioned at 45° which passed through the 420 nm light for fura-2 excitation from a Xe arc lamp and reflected the light below 390 nm for NP-EGTA flash photolysis from a Xe arc flash lamp. The second 430 nm dichroic reflected both lights through the objective to the cell under experiment and allowed only fura-2 fluorescent light to pass back to the photomultiplier through a 510 nm barrier filter. [Ca<sup>2+</sup>]<sub>i</sub> measurements were performed as described by Carter and Ogden (1994). The equation used in calculation is:

$$[\text{Ca}^{2+}]_i = K_d \frac{F - F_{\min}}{F_{\max} - F}, \quad (1)$$

where  $F_{\max}$  is the autofluorescence in the cell-attached configuration,  $F_{\min}$  is fluorescence in a resting whole-cell recording and  $F$  is fluorescence during the flash.

### Microinjection of antibodies

Transjector 4657 with a micromanipulator (Eppendorf, Germany) was used. Pulses (8–12 hPa, 0.3 to 1 second) were applied with a compensation pressure set to 1 hPa. Microinjection solution consisted of: 150 mM K-gluconate, 2 mM MgCl<sub>2</sub>, 10 mM Hepes. Pipettes were prepared with a horizontal puller (P-87, Sutter Instruments, CA, USA). Microinjected cells were identified with co-injection of rhodamine-labeled dextran (5 mg/ml, Sigma Chemical Co., USA, 25 kDa). Injection of dextran marker alone did not affect secretory responses per se. The same affinity-purified anti-Gα<sub>3</sub> antibody was microinjected into cells as in immunofluorescent studies. The control antibodies (preimmune antibody) were purified using Protein A-Sepharose to prepare immunoglobulin fractions from sera of nonimmune.

Antibodies were injected into cells (50 μg/ml) together with the dextran marker, then cells were placed in an incubator for 1 to 2 hours at 37°C before experiments were performed.

## RESULTS

### Subcellular localisation of Gα<sub>3</sub> and Gα<sub>1/2</sub> in rat melanotrophs

The subcellular distribution of G<sub>o</sub> and G<sub>i</sub> proteins in cultured rat melanotrophs was investigated by immunofluorescence and confocal microscopy using affinity-purified anti-Gα<sub>o</sub>, anti-Gα<sub>3</sub> and anti-Gα<sub>1/2</sub> antibodies (Vitale et al., 1996). As illustrated in Fig. 1, the anti-Gα<sub>3</sub> immunoreactivity was restricted to the subsplasmalemmal region, suggesting that the majority of G<sub>i3</sub> protein resides probably in the plasma membrane. A

comparable distribution for G<sub>i3</sub> was previously reported in chromaffin cells (Vitale et al., 1996) and mast cells (Aridor et al., 1993). In contrast, the anti-Gα<sub>1/2</sub> antibody decorated some intracellular compartments distributed over the whole cell body excluding the nucleus (Fig. 2). We could not detect any specific immunostaining with the anti-Gα<sub>o</sub> antibodies (data not shown).

To verify the association of Gα<sub>3</sub> with the plasma membrane, double immunofluorescent experiments were performed with antibodies against syntaxin I, a marker for plasma membranes and against synaptotagmin I, a secretory granule marker (Söllner and Rothman, 1994). As shown in Fig. 1A,B, the pattern of anti-Gα<sub>3</sub> immunoreactivity was identical to that obtained with anti-syntaxin I but differed from the anti-synaptotagmin I labelling (Fig. 1D,E). The cytofluorogram representing the pixels measured in the Gα<sub>3</sub> and syntaxin images and the mask constructed from the colocalized pixels in the cytofluorogram (Fig. 1C) confirmed that Gα<sub>3</sub> is entirely present on the plasma membrane in rat melanotrophs. Note the partial colocalization of synaptotagmin I with Gα<sub>3</sub> at the cell periphery (Fig. 1F), most likely representing the subpopulation of secretory granules docked at the plasma membrane.

Double labelling experiments performed with the anti-

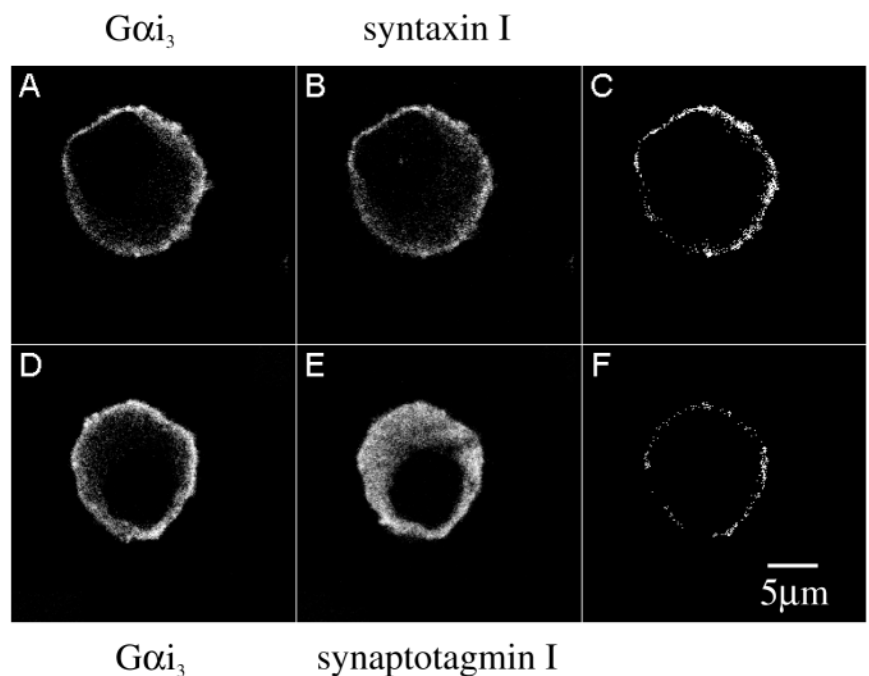

**Fig. 1.** Subcellular distribution of  $\alpha$  subunit of heterotrimeric G<sub>i3</sub>-protein in rat melanotrophs. Double immunofluorescence confocal micrographs obtained with rabbit anti-Gα<sub>3</sub> antibodies (A) and mouse anti-syntaxin I antibodies (B) or rabbit anti-Gα<sub>3</sub> antibodies (D) and mouse anti-synaptotagmin I antibodies (E). Immunoreactivity was detected with Cy3-conjugated anti-rabbit and fluorescein-conjugated anti-mouse antibodies. Optical sections were taken through the center of the nucleus. Cell diameter is approximately 12 μm. Two-dimensional scatter histograms of grey values were obtained from Gα<sub>3</sub>-syntaxin or Gα<sub>3</sub>-synaptotagmin labellings recorded simultaneously in the same section by a double exposure procedure. (C,F) illustrate the masks obtained after selection of the pixels double-labelled with Cy3 and fluorescein from the two-dimensional scatter histograms of grey values. Note the colocalization of Gα<sub>3</sub> with syntaxin I in the cell periphery, suggesting the preferential association of G<sub>i3</sub> with the plasma membrane.

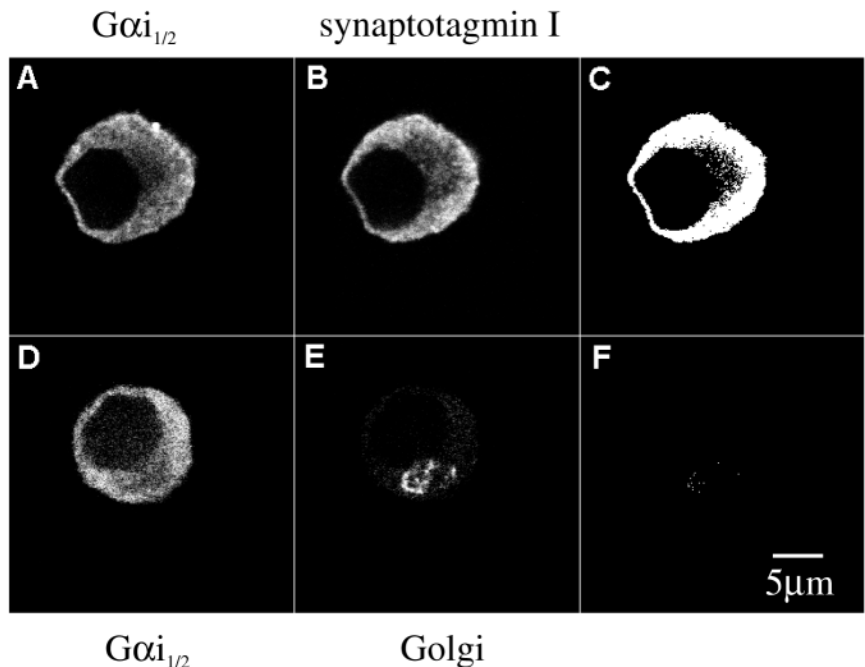

**Fig. 2.** Subcellular distribution of  $\alpha$  subunits of heterotrimeric  $G_{i1/2}$ -protein, secretory granules and Golgi apparatus in rat melanotrophs. Cells were double-labelled with rabbit anti- $G_{i1/2}$  antibodies (A,D) and either mouse anti-synaptotagmin I (B) or mouse anti-Golgi antibodies (E). Immunoreactivity was detected with Cy3-conjugated anti-rabbit antibodies and fluorescein-conjugated anti-mouse antibodies. Optical sections were made through the center of the cell. Cell diameter is approximately 12  $\mu\text{m}$ . Horizontal pairs of images represent the same cell. The dots corresponding to the co-localized pixels were used to construct the masks shown in C and F.  $G_{i1/2}$  colocalizes with the secretory granule marker synaptotagmin I in cultured rat melanotrophs.

$G_{i1/2}$  and anti-synaptotagmin I antibodies or anti- $G_{i1/2}$  and anti-Golgi antibodies revealed the co-localization of  $G_{i1/2}$  with intracellular organelle(s) bearing synaptotagmin I (Fig. 2A-C). No apparent  $G_{i1/2}$  labelling could be detected on the Golgi apparatus (Fig. 2D,E), an observation confirmed by the absence of colocalized pixels in the mask illustrated in Fig. 2F. Thus,  $G_{i1/2}$  appears to be preferentially associated with the membrane of secretory granules in melanotrophs.

#### Effect of mastoparan and synthetic C-terminal peptides corresponding to $G_{\alpha i3}$ and $G_{\alpha i1/2}$ on secretory activity of rat melanotrophs

Previous studies suggest a role of pertussis toxin-sensitive trimeric G proteins in regulated secretory activity of rat melanotrophs (Rupnik and Zorec, 1995). To further precise the function of the pertussis toxin-sensitive  $G_{i3}$ - and  $G_{i1/2}$ -proteins in the exocytotic pathway, we measured changes in membrane capacitance in rat melanotrophs by the whole-cell patch-clamp technique. Peptides corresponding to the C-terminal sequence of  $G_{\alpha i3}$  and  $G_{\alpha i1/2}$  were introduced into the cytosol with the patch-pipette. In cells dialysed with  $\text{Ca}^{2+}$ , membrane capacitance ( $C_m$ ) increased by  $16 \pm 3\%$  after 5 minutes of recording (Fig. 3). In the presence of the  $G_{\alpha i3}$  peptide, responses were not significantly different from controls (Fig. 4). In contrast, the inclusion of the synthetic  $G_{\alpha i1/2}$  peptide resulted in a slight but significant increase of the extent of capacitance increase (Fig. 4). We then studied whether the G $\alpha$  peptides may interfere with the effect of mastoparan on melanotroph secretory activity. Mastoparan, an amphiphilic tetradecapeptide from wasp venom, is a potent guanine nucleotide exchange promoter (Higashijima et al., 1990) thought to activate trimeric G proteins by interacting with the C-terminal domain of the  $\alpha$ -subunit (Weingarten et al., 1990). Addition of 1  $\mu\text{M}$  mastoparan increased  $C_m$  by  $62 \pm 5\%$ , which is significantly higher in

comparison to controls (Figs 3 and 4). Addition of the synthetic  $G_{\alpha i3}$  peptide completely neutralised this stimulatory effect of mastoparan peptide whereas the  $G_{\alpha i1/2}$  peptide had no effect (Figs 3 and 4). Control experiments performed with a  $G_{\alpha i3}$  peptide with a scrambled sequence confirmed that the  $G_{\alpha i3}$  peptide specifically reversed the mastoparan-stimulated changes in membrane capacitance (Fig. 4). We also preinjected anti- $G_{\alpha i3}$ -antibody to test its effect on mastoparan-induced increase of  $C_m$ . Anti- $G_{\alpha i3}$ -antibody completely neutralized the effect of mastoparan (Fig. 4). These results suggest that  $G_{i3}$  mediates the stimulatory effect of mastoparan on exocytosis in rat melanotrophs.

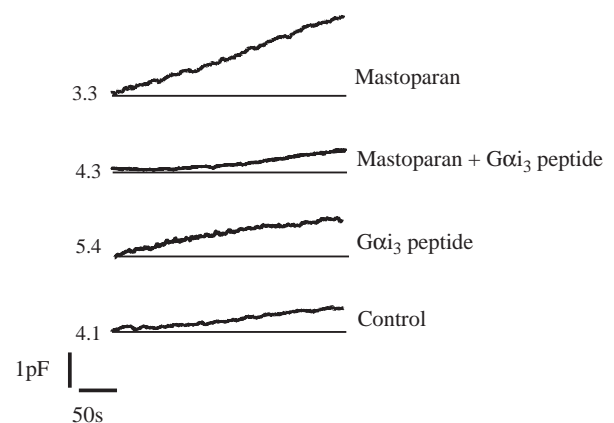

**Fig. 3.** Representative time-dependent changes in membrane capacitance in cells dialysed with a patch-pipette solution containing either 1  $\mu\text{M}$  [ $\text{Ca}^{2+}$ ] (Control), 1  $\mu\text{M}$  [ $\text{Ca}^{2+}$ ] with 1  $\mu\text{M}$  mastoparan (Mastoparan), 1  $\mu\text{M}$  [ $\text{Ca}^{2+}$ ] with 1  $\mu\text{M}$  mastoparan and 100  $\mu\text{M}$   $G_{\alpha i3}$  synthetic peptide (Mastoparan +  $G_{\alpha i3}$  peptide) or 1  $\mu\text{M}$  [ $\text{Ca}^{2+}$ ] with 100  $\mu\text{M}$   $G_{\alpha i3}$  synthetic peptide ( $G_{\alpha i3}$  peptide). Numbers adjacent to traces indicate resting membrane capacitance in pF. Traces were filtered at 10 Hz (4 pole Bessel,  $-3\text{dB}$ ).

**Fig. 4.** Mean secretory responses in single melanotrophs measured as a relative change in membrane capacitance 300 seconds after the start of whole-cell recording relative to the resting membrane capacitance (% ΔC). Cells were dialysed with a patch-pipette solution containing 1 μM [Ca<sup>2+</sup>] in the absence (control) or presence of either 100 μM Gαi<sub>3</sub> synthetic peptide (+Gi3), 100 μM Gαi<sub>1/2</sub> synthetic peptide (+Gi1/2), 1 μM mastoparan (+masto.), 1 μM mastoparan and 100 μM Gαi<sub>3</sub> synthetic peptide (+masto.+Gi3), 1 μM mastoparan and 100 μM Gαi<sub>1/2</sub> synthetic peptide (+masto.+Gi1/2), 1 μM mastoparan and 100 μM Gαi<sub>3</sub> synthetic peptide with a scrambled sequence (+masto +Gi3 scrambled), or 1 μM mastoparan in a cell preinjected with the anti-Gαi<sub>3</sub>-antibody (+masto +antiGi3). Error bars represent standard error of the mean. Number of cells recorded is indicated in brackets. Asterisks indicate significant differences compared to the control (\**P*<0.05, \*\**P*<0.01, Student's *t*-test).

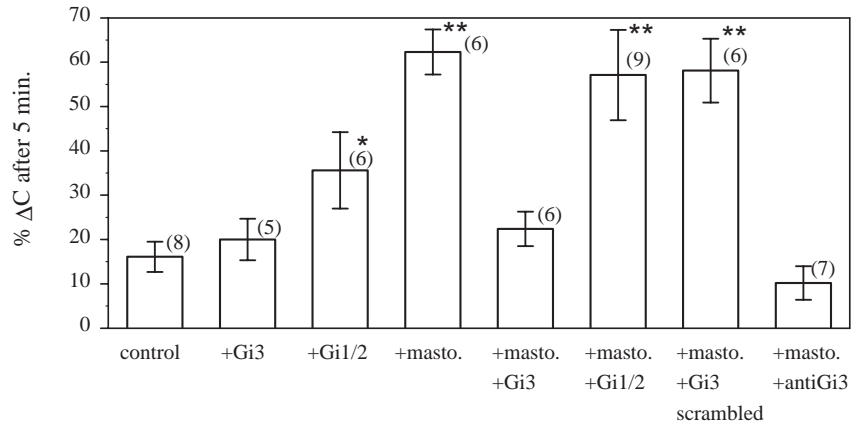

**Anti-Gαi<sub>3</sub> antibodies affect the slow but not the fast kinetic component of exocytosis in rat melanotrophs**

Whole cell dialysis with 1 μM Ca<sup>2+</sup> elicits a slow gradual rise in C<sub>m</sub> indicative of a net increase in exocytosis over endocytosis (Fig. 3, see Zupančič et al., 1994). In contrast, a rapid multiphasic exocytotic response is triggered by increasing cytosolic [Ca<sup>2+</sup>]<sub>i</sub> quickly and uniformly using flash photolysis of caged Ca<sup>2+</sup> (Neher and Zucker, 1993). A UV light flash that photolyzed ~20% of the loaded Ca<sup>2+</sup>-bound NP-EGTA activated a biphasic membrane capacitance response (Fig. 5A,B) similar to that reported previously (Neher and Zucker, 1993; Thomas et al., 1993a,b; Heinemann et al., 1994; Kasai et al., 1996; Takahashi et al., 1997; Ninomiya et al., 1997; Xu et al., 1998). The flash discharge (arrow, Fig. 5A) transiently increased [Ca<sup>2+</sup>]<sub>i</sub> to 24 μM, which returned to baseline exponentially with a time constant of around 5 seconds. Membrane C<sub>m</sub> rapidly increased by 805 fF and subsequently decreased due to slow endocytosis. The prominent C<sub>m</sub> increase (termed slow exocytosis, labelled B in Fig. 5A, lower trace) was preceded by a

smaller (148 fF) transient rise in C<sub>m</sub> (termed fast exocytosis, labelled A, see inset in Fig. 5A, lower trace), which was clearly resolved at higher time resolution (Fig. 5A, inset). When NP-EGTA loaded into the cell lacked Ca<sup>2+</sup>, a UV flash changed

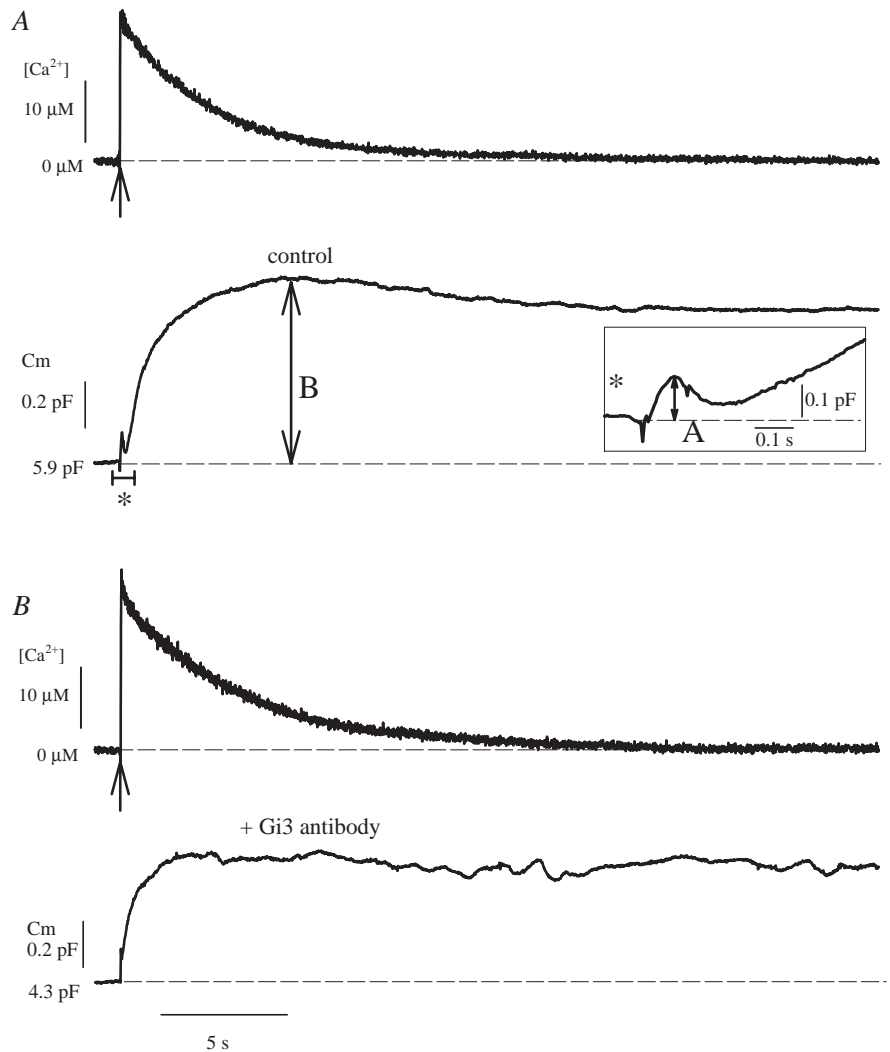

**Fig. 5.** (A) Representative time-dependent changes in [Ca<sup>2+</sup>]<sub>i</sub> (top trace) and membrane capacitance (C<sub>m</sub>, lower trace) after UV flash photolysis of Ca<sup>2+</sup>-loaded NP-EGTA (arrow). Insert in the right part of the lower trace illustrates a high-time resolution of the C<sub>m</sub> trace indicated by the asterisk. The amplitude of the fast response in C<sub>m</sub> is labelled as A and the amplitude of the slow response is labelled as B. (B) A representative trace of [Ca<sup>2+</sup>]<sub>i</sub> (upper trace) and membrane capacitance (lower trace) elicited by a transient increase in [Ca<sup>2+</sup>]<sub>i</sub> in a cell preinjected with the anti-Gαi<sub>3</sub> antibody. Numbers adjacent to records in C<sub>m</sub> indicate the resting membrane capacitance.



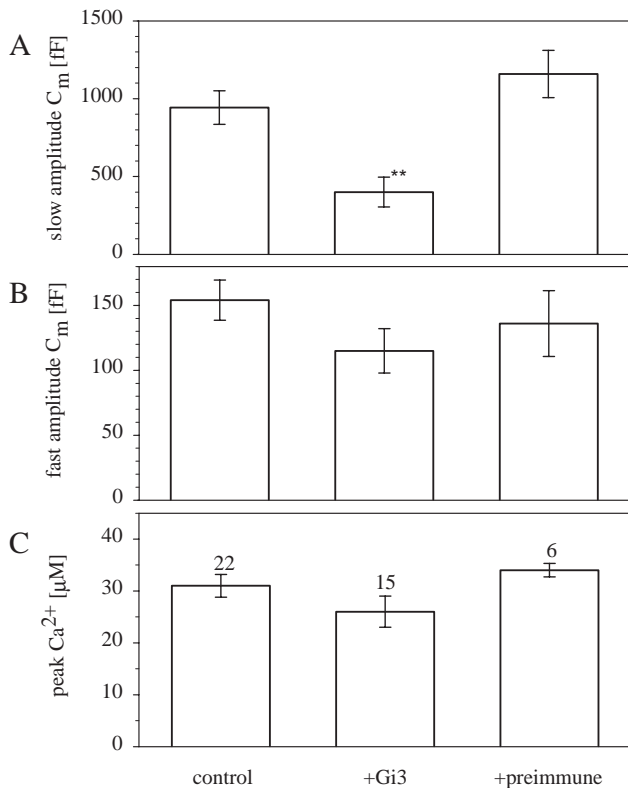

**Fig. 6.** Mean amplitude of the slow kinetic component (A) and mean amplitude of the fast kinetic component (B) of the biphasic secretory response elicited by a transient increase in  $[Ca^{2+}]_i$  by UV flash photolysis. (C) Average peak response in  $[Ca^{2+}]_i$  elicited by UV flash photolysis of  $Ca^{2+}$ -loaded NP-EGTA. Numbers adjacent to columns indicate the numbers of cells tested. Error bars indicate standard error of the mean and asterisks indicate significant differences compared to the control (\*\* $P < 0.01$ , Student's  $t$ -test).

neither  $[Ca^{2+}]_i$  nor  $C_m$  (not shown). The amplitude and rates of both the fast and slow components of the  $C_m$  increase were dependent upon the  $[Ca^{2+}]_i$  levels achieved by uncaging of  $Ca^{2+}$ -NP-EGTA (M. Rupnik et al., unpublished).

Cells injected with anti- $G\alpha_{i3}$  antibodies exhibited  $C_m$  responses that were different to control cells or to cells injected with a preimmune serum (Fig. 6). The amplitude of the slow component of the UV flash-triggered capacitance response was significantly attenuated (Figs 5B, 6A). This decrease was not due to a reduction in the UV flash elicited cytosolic calcium as illustrated in Fig. 6C. Interestingly, the amplitude of the fast exocytosis was not affected by the anti- $G_i3$  antibody pretreatment. Taken together, these results suggest that  $G_i3$ -protein acts in the slow but not in the fast exocytosis of rat melanotrophs.

## DISCUSSION

The aim of the present work was to study the role of trimeric G-proteins in regulated secretion of rat pituitary *pars intermedia* cells. Previous work suggested that subunits of various trimeric G-proteins reside on both intracellular and plasma membranes in pituitary cells (Muller et al., 1994) and

that a pertussis toxin-sensitive G protein may play a role in regulated secretion from rat *pars intermedia* cells (Rupnik and Zorec, 1995). Using confocal immunocytochemistry to study the subcellular localization of the pertussis toxin-sensitive  $G\alpha_{i3}$  and  $G\alpha_{i1/2}$  proteins, we show here that  $G\alpha_{i3}$  appears to be exclusively present in the plasma membrane (Fig. 1), an observation which correlates well with the distribution previously observed in secretory chromaffin cells (Vitale et al., 1996) and mast cells (Aridor et al., 1993). In contrast, we found that  $G\alpha_{i1/2}$  is mainly associated with some intracellular compartment (Fig. 2), most likely the membrane of secretory granules.

To elucidate the function of  $G_i3$  and  $G_{i1/2}$  in regulated secretion of rat melanotrophs, we used the patch-clamp technique to monitor changes in membrane capacitance, a parameter linearly related to changes in membrane surface area. A net increase in surface area over the period of minutes is indicative of a net increase in exocytosis (Neher and Marty, 1982; Zupančič et al., 1994). Mastoparan, an activator of G proteins, enhanced the extent of capacitance increase by a factor of 4 to 5 (Figs 3 and 4). If the increase in membrane capacitance is due to inhibited endocytosis, then mastoparan should produce a similar effect at virtually free cytosolic  $Ca^{2+}$ . Dialysis of  $Ca^{2+}$ -free pipette solution resulted in an increase in membrane capacitance of a few % (Rupnik et al., 1997). Therefore, the mastoparan-enhanced increase in membrane capacitance at high cytosolic  $Ca^{2+}$  is very likely due to stimulated exocytosis. Inclusion of a synthetic peptide corresponding to the C terminus of  $G\alpha_{i3}$  neither affected the time course nor the extent of membrane capacitance increase in rat melanotrophs. However, mastoparan-enhanced secretory responses were significantly attenuated in the presence of the  $G\alpha_{i3}$  peptide. This observation cannot be attributed to some nonspecific effect of the  $G\alpha_{i3}$  peptide since a scrambled version of the same peptide did not affect mastoparan-enhanced secretory responses (Fig. 4). Furthermore, the C terminus peptide corresponding to  $G\alpha_{i1/2}$ , which has a high sequence similarity with the  $G\alpha_{i3}$  synthetic peptide, did not modify the mastoparan induced-secretory responses. Moreover, preinjection of anti- $G\alpha_{i3}$ -antibodies abolished mastoparan-induced secretory responses (Fig. 4). These findings strongly suggest that mastoparan stimulates secretory activity in rat melanotrophs through the activation of the plasma membrane-associated  $G_i3$  protein. Interestingly, the participation of a plasma membrane-bound  $G_i3$  in the late stages of exocytosis has been previously reported in mast cells (Aridor et al., 1993) and in chromaffin cells (Vitale et al., 1996). In agreement with the present results, mastoparan triggers exocytosis in mast and chromaffin cells and the introduction of anti- $G_i3$  antibodies or a synthetic peptide corresponding to the C-terminal sequence of  $G_i3$  into these cells specifically blocks mastoparan-evoked secretion (Aridor et al., 1993; Vitale et al., 1996). Thus, regulated exocytosis of large dense core vesicles in endocrine and neuroendocrine cells appears to involve a common molecular switch i.e. the activation of a trimeric  $G_i3$  protein located at the plasma membrane. Considering that mastoparan is mimicking membrane G protein-coupled receptors (Weingarten et al., 1990), it remains to be determined whether the  $G_i3$ -mediated regulation of exocytosis is coupled to a plasma membrane-associated receptor or to some unknown endogenous

pseudoreceptor controlling the activation/inactivation cycle of Gi<sub>3</sub> (Vitale et al., 1994b).

Studies in diverse secretory systems indicate the ATP is required to prime the exocytotic apparatus whereas Ca<sup>2+</sup> triggers the final ATP-independent fusion event (Bittner and Holz, 1992; Hay and Martin, 1992). In permeabilized chromaffin and mast cells, the mastoparan-activated Gi<sub>3</sub> stimulates the ATP-independent component of secretion (Vitale et al., 1996; Aridor et al., 1993), suggesting that Gi<sub>3</sub> is involved in the late fusion step of exocytosis. On the other hand, we show here that anti-Gi<sub>3</sub> antibodies attenuate the slow but not the fast component of membrane capacitance biphasic responses triggered by a quick and spatially homogeneous rise in [Ca<sup>2+</sup>]<sub>i</sub>. Since slow kinetic component has been attributed to vesicles that need to advance to a state from which they can rapidly undergo exocytosis (Henkel and Almers, 1996), our results would suggest that Gi<sub>3</sub> may control early stages of the exocytotic pathway in melanotrophs. Alternatively, it has also been suggested that these multiple kinetic components of calcium-induced capacitance changes may represent distinct pathways of regulated exocytosis (Kasai et al., 1996; Ninomiya et al., 1997; Takahashi et al., 1997; Xu et al., 1998). Thus, the plasma membrane-associated Gi<sub>3</sub> may as well play a crucial role in distinct pathways of regulated exocytosis, which warrants further analysis to be carried out.

We thank M. Seagar (Marseille, France) for a sample of anti-synaptotagmin I (Takahashi et al., 1991; Leveque et al., 1992) and anti-syntaxin I (Leveque et al., 1994; El Far et al., 1995) antibodies, and S. Grilc for cell cultures. This work was supported by the East-West INSERM grant (no. 4E001B) awarded to M-F.B. and R.Z., and by a grant from The Ministry of Sciences and Technology of the Republic of Slovenia awarded to R.Z.

## REFERENCES

- Ahnert-Hilger, G., Schäfer, T., Spicher, K., Grund, C., Schultz, G. and Wiedenmann, B. (1994). Detection of G protein heterotrimers on large dense core and small synaptic vesicles of neuroendocrine and neuronal cells. *Eur. J. Cell Biol.* **65**, 26-38.
- Aridor, M., Rajmleivich, G., Beaven, M. A. and Sagi-Eisenberg, R. (1993). Activation of exocytosis by the heterotrimeric G protein Gi<sub>3</sub>. *Science* **262**, 1569-1572.
- Bittner, M. A. and Holz, R. W. (1992). Kinetic analysis of secretion from permeabilized adrenal chromaffin cells reveals distinct components. *J. Biol. Chem.* **267**, 16219-16225.
- Burgoyne, R. D. and Morgan, A. (1998). Analysis of regulated exocytosis in adrenal chromaffin cells: insights into NSF/SNAP/SNARE function. *BioEssays* **20**, 328-335.
- Calakos, N. and Scheller, R. H. (1996). Synaptic vesicle biogenesis, docking, and fusion: molecular description. *Physiol. Rev.* **76**, 1-29.
- Carter, T. D. and Ogden, D. (1994). Acetylcholine-stimulated changes of membrane potential and intracellular Ca<sup>2+</sup> concentration recorded in endothelial cells in situ in the isolated rat aorta. *Pflugers Archiv.* **428**, 476-484.
- Chasserot-Golaz, S., Vitale, N., Sagot, I., Delouche, B., Diring, S., Pradel, L. A., Henry, J. P., Aunis, D. and Bader, M. F. (1996). Annexin II in exocytosis: catecholamine secretion requires the translocation of p36 to the subplasmalemmal region in chromaffin cells. *J. Cell Biol.* **133**, 1217-1236.
- Ellis-Davies, G. C. and Kaplan, J. H. (1994). Nitrophenyl-EGTA, a photolabile chelator that selectively binds Ca<sup>2+</sup> with high affinity and releases it rapidly upon photolysis. *Proc. Nat. Acad. Sci. USA* **91**, 187-191.
- El Far, O., Charvin, N., Leveque, C., Martin-Moutot, N., Takahashi, M., and Seagar, M. J. (1995). Interaction of a synaptobrevin (VAMP)-syntaxin complex with presynaptic calcium channels. *FEBS Lett.* **361**, 101-105.
- Gasman, S., Chasserot-Golaz, S., Popoff, M. R., Aunis, D. and Bader, M. F. (1997). Trimeric G proteins control exocytosis in chromaffin cells. Go regulates the peripheral actin network and catecholamine secretion by a mechanism involving the small GTP-binding protein Rho. *J. Biol. Chem.* **272**, 20564-20571.
- Grynkiewicz, G., Poenie, M. and Tsien, R. Y. (1985). A new generation of Ca<sup>2+</sup> indicators with greatly improved fluorescence properties. *J. Biol. Chem.* **260**, 3440-3450.
- Hamm, H. E., Deretic, D., Arendt, A., Hargrave, P. A., Koenig, B. and Hofmann, K. P. (1988). Site of G protein binding to rhodopsin mapped with synthetic peptides from the alpha subunit. *Science* **241**, 832-835.
- Hay, J. C. and Martin, T. F. J. (1992). Resolution of regulated secretion into sequential MgATP-dependent and calcium-dependent stages mediated by distinct cytosolic proteins. *J. Cell Biol.* **119**, 139-151.
- Heinemann, C., Chow, R. H., Neher, E. and Zucker, R. S. (1994). Kinetics of the secretory response in bovine chromaffin cells following flash photolysis of caged Ca<sup>2+</sup>. *Biophys. J.* **67**, 2546-2557.
- Henkel, A. W. and Almers, W. (1996). Fast steps in exocytosis and endocytosis studied by capacitance measurements in endocrine cells. *Curr. Opin. Neurobiol.* **6**, 350-357.
- Higashijima, T., Burnier, J. and Ross, E. M. (1990). Regulation of Gi and Go by mastoparan, related amphiphilic peptides, and hydrophobic amines. Mechanism and structural determinants of activity. *J. Biol. Chem.* **265**, 14176-14186.
- Jasmin, B. J., Cartaud, J., Bornens, M. and Changeux, J. P. (1989). Golgi apparatus in chick skeletal muscle: changes in its distribution during end plate development and after denervation. *Proc. Nat. Acad. Sci. USA* **86**, 7218-7222.
- Kasai, H., Takagi, H., Ninomiya, Y., Kishimoto, T., Ito, K., Yoshida, A., Yoshioka, T. and Miyashita, Y. (1996). Two components of exocytosis and endocytosis in phaeochromocytoma cells studied using caged Ca<sup>2+</sup> compounds. *J. Physiol.* **494**, 53-65.
- Konrad, R. J., Young, R. A., Record, R. D., Smith, R. M., Butkerait, P., Manning, D., Jarett, L., Wolf, B. A. (1995). The heterotrimeric G-protein Gi is localized to the insulin secretory granules of beta-cells and is involved in insulin exocytosis. *J. Biol. Chem.* **270**, 12869-12876.
- Lang, J., Nishimoto, I., Okamoto, T., Regazzi, R., Kiraly, C., Weller, U. and Wollheim, C. B. (1995). Direct control of exocytosis by receptor-mediated activation of the heterotrimeric GTPases Gi and G(o) or by the expression of their active G alpha subunits. *EMBO J.* **14**, 3636-3644.
- Leveque, C., El Far, O., Martin-Moutot, N., Sato, K., Kato, R., Takahashi, M., Seagar, M. J. (1994). Purification of the N-type calcium channel associated with syntaxin and synaptotagmin. A complex implicated in synaptic vesicle exocytosis. *J. Biol. Chem.* **269**, 6306-6312.
- Leveque, C., Hoshino, T., David, P., Shoji-Kasai, Y., Leys, K., Omori, A., Lang, B., El Far, O., Sato, K., Martin-Moutot, N. et al. (1992). The synaptic vesicle protein synaptotagmin associates with calcium channels and is a putative Lambert-Eaton myasthenic syndrome antigen. *Proc. Nat. Acad. Sci. USA* **89**, 3625-3629.
- Lindau, M. and Neher, E. (1988). Patch-clamp techniques for time-resolved capacitance measurements in single cells. *Pflugers Arch.* **411**, 137-146.
- Mains, R. E. and Eipper, B. A. (1979). Synthesis and secretion of corticotropins, melanotropins and endorphins by rat intermediate pituitary cells. *J. Biol. Chem.* **254**, 7885-7894.
- Martin, T. F. J. (1997). Stages of regulated exocytosis. *Trends Cell Biol.* **7**, 271-276.
- Muller, L., Picart, R., Barret, A., Bockaert, J., Homburger, V. and Tougaard, C. (1994). Identification of multiple subunits of heterotrimeric G proteins on the membrane of secretory granules in rat prolactin anterior pituitary cells. *Moll. Cell. Neurosci.* **5**, 556-566.
- Neher, E. and Marty, A. (1982). Discrete changes of cell membrane capacitance observed under conditions of enhanced secretion in bovine adrenal chromaffin cells. *Proc. Nat. Acad. Sci. USA* **79**, 6712-6716.
- Neher, E. and Zucker, R. S. (1993). Multiple calcium-dependent processes related to secretion in bovine chromaffin cells. *Neuron* **10**, 21-30.
- Ninomiya, Y., Kishimoto, T., Yamazawa, T., Ikeda, H., Miyashita, Y. and Kasai, H. (1997). Kinetic diversity in the fusion of exocytotic vesicles. *EMBO J.* **16**, 929-934.
- Palm, D., Munch, G., Malek, D., Dees, C. and Hekman, M. (1990). Identification of a Gs-protein coupling domain to the beta-adrenoceptor using site-specific synthetic peptides. Carboxyl terminus of Gs alpha is involved in coupling to beta-adrenoceptors. *FEBS Lett.* **261**, 294-298.
- Rapp, G. and Güth, K. (1988). A low cost high intensity flash device for photolysis experiments. *Pflugers Archiv* **411**, 200-203.

- Rupnik, M. and Zorec, R.** (1992). Cytosolic chloride ions stimulate  $\text{Ca}^{2+}$ -induced exocytosis in melanotrophs. *FEBS Lett.* **303**, 221-223.
- Rupnik, M. and Zorec, R.** (1995). Intracellular  $\text{Cl}^-$  modulates  $\text{Ca}^{2+}$ -induced exocytosis from rat melanotrophs through GTP-binding proteins. *Pflügers Arch.* **431**, 76-83.
- Rupnik, M., Law, G. J., Mason, W. T. and Zorec, R.** (1997). Mastoparan and Rab3AL peptide potentiation of calcium-independent secretory activity in rat melanotrophs is inhibited by GDPbetaS. *FEBS Lett.* **411**, 356-358.
- Söllner, T. and Rothman, J. E.** (1994). Neurotransmission: harnessing fusion machinery at the synapse. *Trends Neurosci.* **17**, 344-348.
- Südhof, T. C.** (1995). The synaptic vesicle cycle: a cascade of protein-protein interactions. *Nature* **375**, 645-653.
- Takahashi, N., Kadowaki, T., Yazaki, Y., Miyashita, Y. and Kasai, H.** (1997). Multiple exocytotic pathways in pancreatic  $\beta$  cells. *J. Cell Biol.* **138**, 55-64.
- Takahashi, M., Arimatsu, Y., Fujita, S., Fujimoto, Y., Kondo, S., Hama, T., Miyamoto, E.** (1991). Protein kinase C and  $\text{Ca}^{2+}$ /calmodulin-dependent protein kinase II phosphorylate a novel 58-kDa protein in synaptic vesicles. *Brain Res.* **551**, 279-292.
- Thomas, P., Surprenant, A. and Almers, W.** (1990). Cytosolic  $\text{Ca}^{2+}$ , exocytosis, and endocytosis in single melanotrophs of the rat pituitary. *Neuron* **5**, 723-733.
- Thomas, P., Wong, J. G., Lee, A. K. and Almers, W.** (1993a). A low affinity  $\text{Ca}^{2+}$  receptor controls the final steps in peptide secretion from pituitary melanotrophs. *Neuron* **11**, 93-104.
- Thomas, P., Wong, J. G. and Almers, W.** (1993b). Millisecond studies of secretion in single rat pituitary cells stimulated by flash photolysis of caged  $\text{Ca}^{2+}$ . *EMBO J.* **12**, 303-306.
- Vitale, N., Mukai, H., Rouot, B., Thierse, D., Aunis, D. and Bader, M. F.** (1993). Exocytosis in chromaffin cells. Possible involvement of the heterotrimeric GTP-binding protein G(o). *J. Biol. Chem.* **268**, 14715-14723.
- Vitale, N., Thiersé, D., Aunis, D. and Bader, M. F.** (1994a). Exocytosis in chromaffin cells: evidence for a MgATP-independent step that requires a pertussis toxin-sensitive GTP-binding protein. *Biochem. J.* **300**, 217-227.
- Vitale, N., Deloulme, J. C., Thiersé, D., Aunis, S. and Bader, M. F.** (1994b). GAP-43 controls the availability of secretory chromaffin granules for regulated exocytosis by stimulating a granule-associated Go. *J. Biol. Chem.* **269**, 30293-30298.
- Vitale, N., Gense, M., Chasserot-Golaz, S., Aunis, D. and Bader, M. F.** (1996). Trimeric G proteins control regulated exocytosis in bovine chromaffin cells: Sequential involvement of Go associated with secretory granules and  $\text{Gi}_3$  bound to the plasma membrane. *Eur. J. Neurosci.* **8**, 1275-1285.
- Weingarten, R., Ransnäs, L., Mueller, H., Sklar, L. A. and Bokoch, G. M.** (1990). Mastoparan interacts with the carboxyl terminus of the alpha subunit of Gi. *J. Biol. Chem.* **265**, 11044-11049.
- Xu, T., Binz, T., Niemann, H. and Neher, E.** (1998). Multiple kinetic components of exocytosis distinguished by neurotoxin sensitivity. *Nature Neurosci.* **1**, 192-200.
- Zorec, R., Henigman, F., Mason, W. T. and Kordaš, M.** (1991). Electrophysiological study of hormone secretion by single adenohipophyseal cells. *Meth. Neurosci.* **4**, 194-210.
- Zupančič, G., Kocmur, L., Veranič, P., Grilc, S., Kordaš, M. and Zorec, R.** (1994). The separation of exocytosis in rat melanotroph membrane capacitance records. *J. Physiol.* **480**, 539-552.
